# Revisiting the effect of red on competition in humans (supplementary information)

Laura Fortunato<sup>1,2</sup> and Aaron Clauset<sup>3,4,2</sup>

<sup>1</sup>*Institute of Cognitive and Evolutionary Anthropology, University of Oxford, Oxford OX2 6PN, UK*

<sup>2</sup>*Santa Fe Institute, Santa Fe, NM 87501, USA*

<sup>3</sup>*Department of Computer Science, University of Colorado, Boulder, CO 80309, USA*

<sup>4</sup>*BioFrontiers Institute, University of Colorado, Boulder, CO 80303, USA*

## Contents

|                                                               |           |
|---------------------------------------------------------------|-----------|
| <b>S1 Outline</b>                                             | <b>3</b>  |
| <b>S2 Structure of Olympic sports</b>                         | <b>4</b>  |
| S2.1 Boxing . . . . .                                         | 4         |
| S2.1.1 Tournament structure . . . . .                         | 4         |
| S2.1.2 Color assignment . . . . .                             | 5         |
| S2.1.3 Placement of winners . . . . .                         | 5         |
| S2.2 Taekwondo . . . . .                                      | 5         |
| S2.2.1 Tournament structure . . . . .                         | 5         |
| S2.2.2 Color assignment . . . . .                             | 5         |
| S2.2.3 Placement of winners . . . . .                         | 6         |
| S2.3 Wrestling . . . . .                                      | 7         |
| S2.3.1 Tournament structure (2004 Athens Olympics) . . . . .  | 7         |
| S2.3.2 Tournament structure (2008 Beijing Olympics) . . . . . | 8         |
| S2.3.3 Color assignment . . . . .                             | 9         |
| S2.3.4 Placement of winners . . . . .                         | 9         |
| S2.4 Summary . . . . .                                        | 11        |
| <b>S3 Olympic data</b>                                        | <b>14</b> |
| S3.1 Data for 2004 Athens Olympics . . . . .                  | 14        |
| S3.1.1 Data for boxing . . . . .                              | 14        |
| S3.1.2 Data for taekwondo . . . . .                           | 14        |

|           |                                                   |           |
|-----------|---------------------------------------------------|-----------|
| S3.1.3    | Data for Greco-Roman wrestling . . . . .          | 14        |
| S3.1.4    | Data for free-style wrestling . . . . .           | 14        |
| S3.2      | Data for 2008 Beijing Olympics . . . . .          | 14        |
| S3.2.1    | Data for boxing . . . . .                         | 15        |
| S3.2.2    | Data for taekwondo . . . . .                      | 15        |
| S3.2.3    | Data for Greco-Roman wrestling . . . . .          | 15        |
| S3.2.4    | Data for free-style wrestling . . . . .           | 15        |
| <b>S4</b> | <b>Data analysis</b>                              | <b>16</b> |
| S4.1      | Hill & Barton's [1] analytical approach . . . . . | 16        |
| S4.1.1    | Main claim . . . . .                              | 16        |
| S4.1.2    | Corollary . . . . .                               | 18        |
| S4.2      | Alternative analytical approach . . . . .         | 19        |
| S4.2.1    | Binomial tests . . . . .                          | 20        |
| S4.2.2    | Type I and Type II error rates . . . . .          | 20        |
| <b>S5</b> | <b>Monte Carlo simulation of competition</b>      | <b>26</b> |
| S5.1      | Simulation specification . . . . .                | 26        |
| S5.2      | Simulation results . . . . .                      | 30        |
| S5.3      | Summary . . . . .                                 | 31        |
| <b>S6</b> | <b>Discussion</b>                                 | <b>33</b> |
|           | <b>References</b>                                 | <b>35</b> |
|           | <b>Acknowledgments</b>                            | <b>36</b> |
|           | <b>Session information</b>                        | <b>37</b> |

## 1 S1 Outline

2 We begin with detailed descriptions of relevant aspects of the competitions, for the four  
3 sports analyzed by Hill & Barton [1], at the 2004 Athens and 2008 Beijing Olympics  
4 (Section S2). Our aim in this section is three-fold. First, we aim to provide the reader  
5 with a mechanistic understanding of the competition structure for the different sports,  
6 focusing on specific features leading to biases towards wins by one color in the outcomes of  
7 the competitions. Second, we highlight the equivalence between the 2008 data presented  
8 here and the 2004 data analysed by Hill & Barton [1]. Third, we outline changes in the  
9 competition structure introduced at the 2012 London Olympics in two of the four sports,  
10 which prevent extension of the analysis to this competition.

11 In Section S3 we provide information on data acquisition and on processing of the data  
12 for analysis, together with descriptives for each sport in the 2004 and 2008 competitions.

13 We then turn to analysis of the data (Section S4). We begin by replicating Hill &  
14 Barton's [1] exact analytical approach, in the process uncovering several shortcomings. We  
15 re-derive the results underpinning Hill & Barton's [1] main claim of a red effect in the 2004  
16 data and show that they are not robust. We then extend the exact analytical approach  
17 to the 2008 data and show that the results do not hold in this case. Next, we propose an  
18 alternative analytical approach, which addresses key shortcomings with Hill & Barton's [1]  
19 analysis and allows us to quantify the magnitude of any effect that may exist in the data.

20 Finally, in Section S5 we use Monte Carlo simulation to demonstrate the existence of  
21 a structural bias towards wins by red in the outcomes of the 2004 competition, which can  
22 explain away the pattern reported by Hill & Barton [1]. This is confirmed by evidence of  
23 a structural bias towards wins by blue in the outcomes of the 2008 competition, consistent  
24 with the pattern observed in the data. The simulation results indicate that incompleteness  
25 in the tournament structures, coupled with variance in skill among the contestants, can  
26 induce a bias that shifts the null distribution towards wins by one color.

27 We conclude with a summary of the insights produced by our multiple lines of analysis  
28 and new data (Section S6). In particular, we discuss their implications for the hypothesis  
29 of an effect of red on human competition, and on human behavior more generally, in the  
30 context of the substantial body of work that has developed over the past decade, building  
31 on Hill & Barton's [1] influential study.

## 32 **S2 Structure of Olympic sports**

33 In the four sports analysed by Hill & Barton [1] (male divisions only), the competition for a  
34 given weight class is arranged as a single-elimination tournament (also known as knock-out  
35 or sudden death). As illustrated in Fig. 1b in the main text, contestants compete in pairs.  
36 The winner of a contest, or bout, proceeds to the following round in the tournament. A  
37 contestant’s placement (top vs. bottom) in a given bout determines the color he wears  
38 in that bout. His relative position may change between bouts, as he progresses through  
39 rounds in the tournament.

40 Two possible sources of incompleteness in a single-elimination tournament are byes and  
41 walkovers, also illustrated in Fig. 1b in the main text. Byes are used if there are fewer than  
42 the number of contestants required to “fill” the outermost round in a competition “tree”;  
43 in this case, one or more contestants are byed to the following round. A walkover involves  
44 a contestant winning the bout by default, because his opponent forfeited the contest (e.g.,  
45 by withdrawing or by failing to show up).

### 46 **S2.1 Boxing**

47 The male division at the 2004 and 2008 Olympics included 11 weight classes.

#### 48 **S2.1.1 Tournament structure**

49 For each weight class, the competition is arranged as a single-elimination tournament. If  
50 the number of contestants in the weight class is not a power of 2, then there will be byes in  
51 the first round of bouts (preliminary round). Contestants not byed compete in this round  
52 so that the number in the following round is reduced to a power of 2. The number of byes  
53 is the difference between the initial number of contestants and the next higher power of 2.

54 In the 2004 and 2008 competitions, the number of contestants  $n$  in the different weight  
55 classes ranged from 16 to 29. In each of the weight classes with more than 16 contestants,  
56  $32 - n$  received a bye to the round of 16 (eighth-finals). The other contestants competed  
57 in  $n - 16$  bouts in the preliminary round, with the winners of the bouts proceeding to the  
58 round of 16.

59 In the 2004 and 2008 competitions, byes were “stacked” at the top of the preliminary  
60 round for each weight class. The initial placement of contestants on the tree (“seeding”)  
61 was drawn by manual lot, and thus at random; byes were determined through this draw,  
62 and thus also at random (Official Report of the XXVIII Olympiad 2: the Games, pag. 277;  
63 Sébastien Gillot, pers. comm. Nov. 2013; Janusz Majcher, pers. comm. Nov. 2013).

64 Starting with the 2012 London Olympics, the draw was seeded based on the Inter-  
65 national Boxing Association (AIBA) ranking and on performance in the World Series of  
66 Boxing (WSB) (Sébastien Gillot, pers. comm. Nov. 2013; Janusz Majcher, pers. comm.  
67 Nov. 2013), with byes and seeded entries evenly distributed across the tree (see e.g., Ap-  
68 pendix E of the AIBA Technical & Competition Rules effective from March 24, 2011). This

69 procedure is used to ensure even strength throughout the competition draw, for example  
70 to avoid two top-ranked boxers meeting in an early round, resulting in one of them being  
71 eliminated prematurely.

### 72 **S2.1.2 Color assignment**

73 In each bout, the contestant in the top position of the bracket wears red, the one in the  
74 bottom position wears blue. Colors are assigned following this procedure, initially based  
75 on the position of the contestants in the outermost round (i.e., the preliminary round);  
76 they are re-assigned accordingly as contestants proceed from one round to the next.

77 In the 2004 and 2008 competitions, contestants wore blue or red uniforms (vest and  
78 shorts) with matching equipment (headguard, gloves).

### 79 **S2.1.3 Placement of winners**

80 The winner of the bout in the final round gets first place (gold), the loser second place  
81 (silver). The losers of the two bouts in the semi-finals share third place (bronze). The  
82 losers of the four bouts in the quarter-finals share fifth place.

## 83 **S2.2 Taekwondo**

84 The male division at the 2004 and 2008 Olympics included four weight classes.

### 85 **S2.2.1 Tournament structure**

86 For each weight class, the competition is arranged as single-elimination tournament with 16  
87 contestants, thus the first round is the round of 16 (eight-finals). There were 16 contestants  
88 in the female and male divisions of the 2004 and 2008 competitions, hence no byes. For  
89 comparison, there were 15 contestants per weight class in the female division of 2004; the  
90 one who picked number 1 in the draw was byed and proceeded to the quarter-finals without  
91 a match in the round of 16 (Jeongkang Seo, pers. comm. Oct.–Nov. 2013).

92 In the 2004 and 2008 competitions, the initial placement of contestants on the tree  
93 was drawn by lot, hence the pairing of contestants was by random selection, without  
94 consideration of skill. The World Taekwondo Federation (WTF) introduced seeding based  
95 on world rankings starting with the 2012 London Olympics (Jeongkang Seo, pers. comm.  
96 Oct.–Nov. 2013).

### 97 **S2.2.2 Color assignment**

98 In each bout, the contestant in the top position of the bracket wears blue, the one in the  
99 bottom position wears red. Colors are assigned following this procedure, initially based  
100 on the position of the contestants in the outermost round in a competition tree; they are  
101 re-assigned accordingly as contestants proceed from one round to the next.

102 In the 2004 and 2008 competitions, contestants wore a white uniform (called “dobok”,  
 103 consisting of long-sleeved top, pants), with blue or red equipment (trunk and head protec-  
 104 tors).

### 105 **S2.2.3 Placement of winners**

106 The winner of the bout in the final round gets first place (gold), the loser second place  
 107 (silver).

108 Repechage is used to determine the ranking of other contestants, with different types  
 109 used in 2004 and 2008.

110 **Repechage (2004 Athens Olympics)** The upper half of the main competition tree is  
 111 “Pool A”, the lower half “Pool B”. There is one repechage contest with six contestants,  
 112 arranged in the following configuration (“b”: blue; “r”: red):

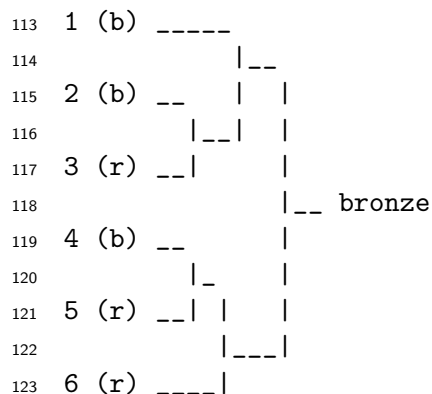

- 1 : loser in semi-final round for Pool A
- 2 : loser in quarter-final round against finalist for Pool B
- 3 : loser in eighth-final round against finalist for Pool B
  
- 4 : loser in eighth-final round against finalist for Pool A
- 5 : loser in quarter-final round against finalist for Pool A
- 6 : loser in semi-final round for Pool B

124 The winner of the bout in the bronze round is awarded third place (bronze).

125 Note that the repechage contest is “symmetric” in the allocation of color, in the sense  
 126 that losers of bouts in the semi-final round wear blue in the top branch (1) and red in the  
 127 bottom one (6); losers of bouts in the quarter-final round wear blue in the top one (2) and  
 128 red in the bottom one (5); losers of bouts in the eighth-final round wear red in the top one  
 129 (3) and blue in the bottom one (4).

130 **Repechage (2008 Beijing Olympics)** The upper half of the main competition tree  
 131 is “Pool A”, the lower half “Pool B”. There are two separate repechage contests, each  
 132 including three contestants, arranged in the following configuration (“b”: blue; “r”: red):

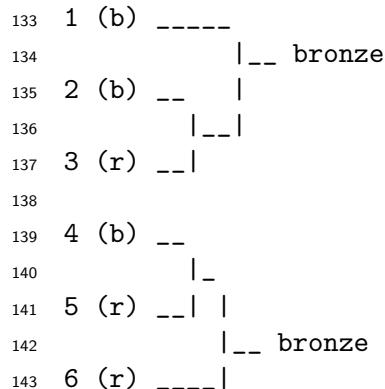

- 1 : loser in semi-final round for Pool A
- 2 : loser in quarter-final round against finalist for Pool B
- 3 : loser in eighth-final round against finalist for Pool B
  
- 4 : loser in eighth-final round against finalist for Pool A
- 5 : loser in quarter-final round against finalist for Pool A
- 6 : loser in semi-final round for Pool B

144 The winners of bouts in the bronze rounds share third place (bronze), the losers get  
 145 fifth place, and the other two contestants get seventh place.

146 Note that the two repechage contests are “symmetric” in the allocation of color, in the  
 147 sense that losers of bouts in the semi-final round wear blue in the top one (1) and red in  
 148 the bottom one (6); losers of bouts in the quarter-final round wear blue in the top one (2)  
 149 and red in the bottom one (5); losers of bouts in the eighth-final round wear red in the top  
 150 one (3) and blue in the bottom one (4).

## 151 **S2.3 Wrestling**

152 The male division at the 2004 and 2008 Olympics included seven weight classes each for  
 153 Greco-Roman wrestling and free-style wrestling. The tournament structure changed sub-  
 154 stantially between 2004 and 2008.

### 155 **S2.3.1 Tournament structure (2004 Athens Olympics)**

156 For each weight class, contestants initially compete in a series of randomly determined  
 157 elimination pools, with each contestant competing against all others in the pool. The

158 contestant with the greatest number of technical points in each pool proceeds to the qual-  
159 ification round; classification points are used to break ties (Tony Black, pers. comm. July  
160 2013).

161 Elimination pools include three or four contestants, with pools of four placed at the  
162 bottom of the list. Contestants in a pool of three compete in two rounds, those in a pool of  
163 four compete in three rounds. Because one contestant per pool proceeds to the qualification  
164 round, if the number of pools is not a power of 2, then there will be byes in the qualification  
165 round. Contestants not byed compete in this round so that the number in the following  
166 round (semi-finals) can be reduced to four. The number of byes is the difference between  
167 the number of elimination pools and the next higher power of 2.

168 In the 2004 competition, the number of contestants in the elimination pools ranged  
169 across weight classes from 19 to 22, and they were arranged in one of the following config-  
170 urations:

- 19 : 6 elimination pools (5 pools of 3, 1 pool of 4)
- 20 : 6 elimination pools (4 pools of 3, 2 pools of 4)
- 21 : 7 elimination pools (7 pools of 3)
- 22 : 7 elimination pools (6 pools of 3, 1 pool of 4)

171 In the qualification round six contestants were arranged in two bouts with two byes,  
172 seven contestants in three bouts with one bye, irrespective of the specific configuration  
173 of the elimination pools. Byes were “stacked” at the bottom of the qualification round  
174 for each weight class. Because the initial placement of contestants into pools was based  
175 on a random draw (Tony Black, pers. comm. July 2013), byes were effectively determined  
176 through this draw, and thus also at random. Because pools of four were placed at the  
177 bottom of the list, and byes were drawn from the bottom, contestants from these pools  
178 were always byed to the semi-finals; contestants from pools of three may also be byed,  
179 depending on the specific configuration.

180 The winners of bouts in the qualification round and byed contestants proceed to the  
181 semi-finals, the losers to the 5–6 final (or the two losers with the most points, in configu-  
182 rations with three bouts in the qualification round). The winners of the two bouts in the  
183 semi-finals proceed to the 1–2 final, the losers to the 3–4 final; see below for placement of  
184 winners.

### 185 **S2.3.2 Tournament structure (2008 Beijing Olympics)**

186 For each weight class, the competition is arranged as a single-elimination tournament. If  
187 the number of contestants in the weight class is not a power of 2, then there will be byes in  
188 the first round of bouts (qualification round). Contestants not byed compete in this round  
189 so that the number in the following round is reduced to a power of 2. The number of byes  
190 is the difference between the initial number of contestants and the next higher power of 2.



191 In the 2008 competition, the number of contestants  $n$  in the different weight classes  
192 ranged from 19 to 21. In each weight class,  $32 - n$  received a bye to the round of 16  
193 (eighth-finals). The other contestants competed in  $n - 16$  bouts in the qualification round,  
194 with the winners of the bouts proceeding to the round of 16.

195 Byes were “stacked” at the top of the qualification round for each weight class. The  
196 initial placement of contestants on the tree, and thus their pairing, was drawn at random;  
197 byes were determined through this draw, and thus also at random [see e.g., Articles 8, 12,  
198 14 of the FILA International Wrestling Rules, release Dec. 2006; confirmed in two later  
199 versions (updated Feb. 2010 and July 2014), which implies that this approach was used in  
200 2008].

### 201 **S2.3.3 Color assignment**

202 In each bout, the contestant at the top of the bracket wears red, the one at the bottom wears  
203 blue. Colors are assigned following this procedure, initially based on the position of the  
204 contestants in the outermost round in a competition tree; they are re-assigned accordingly  
205 as contestants proceed from one round to the next.

206 In the 2004 competition, the same assignment procedure applied to bouts in the elimi-  
207 nation pools, but the ordering of contestants in a bout based on draw number “switched”  
208 between the three rounds of each pool. Specifically, the contestant with the lower draw  
209 number in the pair competed in the top position in Round 1, in the bottom position in  
210 Round 2, and in the top position in Round 3.

211 In the 2004 and 2008 competitions, contestants wore a blue or red one-piece singlet.

### 212 **S2.3.4 Placement of winners**

213 The winner of the bout in the final round gets first place (gold), the loser second place  
214 (silver).

215 In the 2004 competition, the losers of the two bouts in the semi-finals compete for third  
216 place (bronze) in the 3–4 final, with the loser of this bout placed fourth. Two losers of the  
217 qualification round compete for fifth and sixth place in the 5–6 final, with any other losers  
218 from the qualification round placed seventh, and further placements based on the number  
219 of classification points scored in the elimination pools. Note that 5–6 finalists often chose  
220 not to compete as they could not medal; in these cases, the bout was won by walkover  
221 (Tony Black, pers. comm. July 2013).

222 In the 2008 competition, repechage is used to determine the ranking of other con-  
223 testants.

224 **Repechage (2008 Beijing Olympics)** The upper half of the tree is the upper branch,  
225 the lower half is the lower branch. There are two separate repechage contests, each contest

226 including up to four contestants (depending on the number of contestants in the qualifi-  
 227 cation round and their placement in this round), arranged in the following configuration  
 228 (“b”: blue; “r”: red):

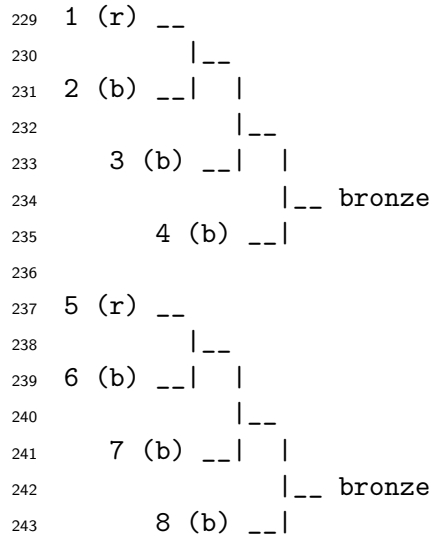

- 1 : loser in qualification round against finalist for upper branch
- 2 : loser in eighth-final round against finalist for upper branch
- 3 : loser in quarter-final round against finalist for upper branch
- 4 : loser in semi-final round against finalist for upper branch
  
- 5 : loser in qualification round against finalist for lower branch
- 6 : loser in eighth-final round against finalist for lower branch
- 7 : loser in quarter-final round against finalist for lower branch
- 8 : loser in semi-final round against finalist for lower branch

244 The winners of bouts in the bronze rounds share third place (bronze), the losers get  
 245 fifth place. Further placements (seventh onwards) are based on the number of classification  
 246 points scored throughout the tournament (Tony Black, pers. comm. July 2013).

247 In the 2008 competition, no contestants in the upper branch competed in qualification  
 248 rounds. Consequently, there was no contestant 1, and contestant 2 was byed to the second  
 249 round of the repechage contest. If the finalists for the lower branch did not compete in the  
 250 qualification round, then there was no contestant 5, and contestant 6 was also byed to the  
 251 second round of the repechage contest.

252 Note that in each bout of the repechage contests, the contestant wearing red had been  
 253 eliminated “earlier” in the competition than the contestant wearing blue. If there is a  
 254 link between the round in which a contestant was eliminated and his skill, then this may

255 potentially introduce a bias towards wins by blue. For example, in the outermost round  
256 of the repechage contest for the upper branch, the red-wearing contestant (1) had been  
257 eliminated in the qualification round, the blue-wearing contestant (2) in the eighth-final  
258 round. The winner of this bout wears red in the next bout; the blue-wearing contestant  
259 in this bout had reached the quarter-final round (3). The winner of this bout wears red in  
260 the next bout; the blue-wearing contestant in this bout had reached the semi-final round  
261 (4). We note that there is no evidence of such a bias in the data (Greco-Roman wrestling:  
262 Section S3.2.3; free-style wrestling: Section S3.2.4), possibly due to the small number of  
263 rounds in each tournament that are potentially affected.

## 264 **S2.4 Summary**

265 Competitions in the four sports analysed by Hill & Barton [1] are arranged as a single-  
266 elimination tournament for each weight class. Generally, contestants compete in pairs,  
267 with the winner of a bout proceeding to the next round in the tournament. Details of the  
268 tournament structure and related aspects vary, however — both across sports and, with  
269 the exception of boxing, within sports between the 2004 and 2008 competitions. Here we  
270 outline the implications of this variation for extension of Hill & Barton’s [1] approach from  
271 the 2004 to the 2008 data.

272 The structural changes within taekwondo affect only the repechage rounds. As dis-  
273 cussed in Section S2.2, the structure of the repechage contests is “symmetric” in the al-  
274 location of color for both 2004 and 2008. Consequently, these changes do not invalidate  
275 extension of Hill & Barton’s [1] approach to the 2008 data.

276 The structural changes in wrestling are more substantial, affecting the overall tourna-  
277 ment structure (Section S2.3). As we discuss below, this provides a candidate mechanism  
278 explaining the different patterns observed in 2004 vs. 2008 (namely, a shift in position of the  
279 byes from the bottom of the relevant round in 2004 to the top in 2008; Section S5). Even  
280 these changes do not, in themselves, invalidate extension of Hill & Barton’s [1] approach to  
281 the 2008 data. In fact, because Hill & Barton [1] excluded bouts from the elimination pool  
282 rounds from analysis of the 2004 data (Section S2.3.1), and elimination pool rounds do not  
283 feature in the 2008 competition, the 2008 dataset more than trebles the number of bouts  
284 available for analysis in both Greco-Roman wrestling and free-style wrestling (Sections S3.1  
285 and S3.2).

286 In light of these changes, we determined which bouts to exclude as walkovers from  
287 the wrestling 2008 data by comparing possible and realized bout outcomes for the two  
288 competitions, as follows. This ensures consistency with the exclusion criteria implemented  
289 by Hill & Barton [1] for the 2004 wrestling data.

For the 2004 competition, possible bout outcomes are:

- EF Victory by forfeit, the loser is not classified
- EV Disqualification from all competition for violation of the rules
- EX 3 cautions or violation of the rules
- E2 Both wrestlers are disqualified for violation of the rules
- PA Injury default
- P0 Victory by points, the loser without technical points
- PP Victory by points, the loser with technical points
- SP Technical superiority, 10 points difference, the loser with points
- ST Technical superiority, 10 points difference, the loser without points
- T0 Victory by fall

290

291 All types except EF, EX occur in the Greco-Roman wrestling data analysed by Hill &  
292 Barton [1] (i.e., excluding elimination pool rounds). Similarly, all types except EF, EX,  
293 E2, SP occur in the free-style wrestling data analysed (i.e., also excluding elimination pool  
294 rounds). In both cases, the bouts coded as won by walkover by Hill & Barton [1] are of  
295 type EV or PA.

For the 2008 competition, possible bout outcomes are:

- E2 Both wrestlers have been disqualified due to infringement of the rules
- EX 3 cautions ‘0’ due to error against the rules
- PP Decision by points, the loser with technical points
- ST Great superiority, a difference of 6 points, the loser without points
- VB Victory by injury
- VT Victory by fall
- EV Disqualification from the whole competition due to infringement of the rules
- P0 Decision by points, the loser without technical point
- SP Victory by technical superiority with the loser scoring technical points
- VA Victory by withdrawal
- VF Victory by forfeit

296

297 The only types that occur in the data are VT, ST, PP, P0 for Greco-Roman wrestling,  
298 and VT, VA, ST, SP, PP, P0 for free-style wrestling. Of these, VT, ST, SP, PP, P0 can be  
299 directly matched to types T0, ST, SP, PP, P0 for the 2004 competition. Given that all  
300 of these occurred in the 2004 data analysed by Hill & Barton [1] and were retained for  
301 analysis, we retained them in the 2008 data. Type VA cannot be directly matched to any  
302 type in the 2004 data. This corresponds to a walkover and was therefore excluded from  
303 the 2008 data.

304 Overall, through careful matching of the 2004 and 2008 data, the two datasets are fully  
305 equivalent for the purpose of testing Hill & Barton’s [1] hypothesis. Crucially, in all sports

306 in both competitions, initial seeding of the competition tree was based on a random draw.  
307 Seeding based on skill — a factor proposed as a potential source of bias towards wins by one  
308 color [2, 3] — does not apply to these data, and it can therefore be ruled out as explaining  
309 for any observed bias. Furthermore, the introduction of seeding based on skill in boxing  
310 (Section S2.1.1) and in taekwondo (Section S2.2.1) at the 2012 London Olympics prevents  
311 extension of Hill & Barton’s [1] approach to this competition.

## 312 **S3 Olympic data**

### 313 **S3.1 Data for 2004 Athens Olympics**

314 The data were obtained from the supplementary information of Hill & Barton [1] (file  
315 435293a-s1.xls) and exported to csv format.

#### 316 **S3.1.1 Data for boxing**

317 The data include all rounds. We excluded entries marked `Walk Over` in column `Method of Win`  
318 (5 total; 3 resulting in a win by red, 2 resulting in a win by blue).

319 The total number of entries for analysis is  $n = 267$ , with  $n_{\text{red}} = 147$  resulting in a win  
320 by red,  $n_{\text{blue}} = 120$  resulting in a win by blue.

#### 321 **S3.1.2 Data for taekwondo**

322 The data include all rounds. We excluded entries marked `Withdrawn` in column `Method of Win`  
323 (5 total; 2 resulting in a win by red, 3 resulting in a win by blue).

324 The total number of entries for analysis is  $n = 75$ , with  $n_{\text{red}} = 43$  resulting in a win by  
325 red,  $n_{\text{blue}} = 32$  resulting in a win by blue.

#### 326 **S3.1.3 Data for Greco-Roman wrestling**

327 The data include only the qualification round, semi-finals, 1–2 final, 3–4 final, and 5–6 final  
328 (i.e., bouts from the elimination pools were not included; Section S2.3.1). We excluded  
329 entries marked `Yes` in column `Won by Walkover` (3 total; 0 resulting in a win by red, 3  
330 resulting in a win by blue).

331 The total number of entries for analysis is  $n = 48$ , with  $n_{\text{red}} = 25$  resulting in a win by  
332 red,  $n_{\text{blue}} = 23$  resulting in a win by blue.

#### 333 **S3.1.4 Data for free-style wrestling**

334 The data include only the qualification round, semi-finals, 1–2 final, 3–4 final, and 5–6 final  
335 (i.e., bouts from the elimination pools were not included; Section S2.3.1). We excluded  
336 entries marked `Yes` in column `Won by Walkover` (3 total; 1 resulting in a win by red, 2  
337 resulting in a win by blue).

338 The total number of entries for analysis is  $n = 51$ , with  $n_{\text{red}} = 27$  resulting in a win by  
339 red,  $n_{\text{blue}} = 24$  resulting in a win by blue.

### 340 **S3.2 Data for 2008 Beijing Olympics**

341 Results books were obtained from the archive at [http://library.la84.org/6oic/OfficialReports/](http://library.la84.org/6oic/OfficialReports/2008/)  
342 2008/ (boxing: file 2008Results\_Book1.pdf; taekwondo, wrestling: file 2008Results\_Book2.pdf).

343 The relevant data were entered manually and exported to `csv` format.

### 344 **S3.2.1 Data for boxing**

345 The data include all rounds. We excluded entries marked `WO` (walkover) in column `method`  
346 (2 total; 0 resulting in a win by red, 2 resulting in a win by blue).

347 The total number of entries for analysis is  $n = 270$ , with  $n_{\text{red}} = 133$  resulting in a win  
348 by red,  $n_{\text{blue}} = 137$  resulting in a win by blue.

### 349 **S3.2.2 Data for taekwondo**

350 The data include all rounds. We excluded entries marked `WDR` (withdrawn) in column  
351 `method` (1 total; 0 resulting in a win by red, 1 resulting in a win by blue).

352 The total number of entries for analysis is  $n = 75$ , with  $n_{\text{red}} = 38$  resulting in a win by  
353 red,  $n_{\text{blue}} = 37$  resulting in a win by blue.

### 354 **S3.2.3 Data for Greco-Roman wrestling**

355 The data include all rounds. No entries were excluded, because none corresponding to  
356 walkovers are represented in the data (Section S2.4).

357 The total number of entries for analysis is  $n = 164$ , with  $n_{\text{red}} = 80$  resulting in a win  
358 by red,  $n_{\text{blue}} = 84$  resulting in a win by blue.

359 Of the 32 entries corresponding to repechage and bronze rounds, 17 ended in a win  
360 by red, 15 in a win by blue (one-sided binomial test,  $H_0 : f_{\text{blue}} \leq 0.5$ ;  $H_A : f_{\text{blue}} > 0.5$ ,  
361  $p = 0.702$ ). There is thus no evidence of a bias towards wins by blue in the repechage  
362 contests (Section S2.3.4).

### 363 **S3.2.4 Data for free-style wrestling**

364 The data include all rounds. We excluded entries marked `VA` (victory by withdrawal;  
365 Section S2.4) in column `method` (1 total; 1 resulting in a win by red, 0 resulting in a win  
366 by blue).

367 The total number of entries for analysis is  $n = 164$ , with  $n_{\text{red}} = 67$  resulting in a win  
368 by red,  $n_{\text{blue}} = 97$  resulting in a win by blue.

369 Of the 33 entries corresponding to repechage and bronze rounds, 13 ended in a win  
370 by red, 20 in a win by blue (one-sided binomial test,  $H_0 : f_{\text{blue}} \leq 0.5$ ;  $H_A : f_{\text{blue}} > 0.5$ ,  
371  $p = 0.148$ ). There is thus no evidence of a bias towards wins by blue in the repechage  
372 contests (Section S2.3.4).

## 373 S4 Data analysis

### 374 S4.1 Hill & Barton’s [1] analytical approach

375 The main claim of a red effect in Hill & Barton’s [1] analysis is in two parts. First, in  
376 each of the four sports, over 50% of the bouts resulted in a red win, with a fraction that  
377 was statistically significantly different from 0.5 in the data pooled over the four sports.  
378 Second, further pooling of the data across sports by round or by weight class revealed a  
379 consistent pattern: in each case, the fraction including over 50% of red wins was statistically  
380 significantly different from 0.5. Specifically, the four sports combined comprised 21 rounds:  
381 of these, 16 presented a majority of red wins, and only four a majority of blue wins.  
382 Similarly, of the 29 weight classes across the four sports, 19 presented a majority of red  
383 wins, and only six a majority of blue wins.

384 As a corollary of the main claim, a final analysis divided the pooled data into four  
385 groups, based on the competitive ability of the contestants (as judged by the number of  
386 points scored). In each of the three most symmetric groups, over 50% of the bouts were  
387 won by red, with a fraction statistically significantly different from 0.5 only in the most  
388 symmetric group; in the least symmetric group, over 50% of bouts were won by blue.

389 We begin by replicating the analysis underpinning Hill & Barton’s [1] main claim,  
390 applied to both the 2004 and the 2008 data, in the process uncovering several shortcomings  
391 (Section S4.1.1). Next, we outline a series of shortcomings that apply to the skill-based  
392 analysis (Section S4.1.2).

#### 393 S4.1.1 Main claim

394 Table S1 summarizes  $\chi^2$  test results for the 2004 data, following the analytical approach  
395 used by Hill & Barton [1]. In all cases, the fraction of red wins  $f_{\text{red}} > 0.5$ , but the only  
396 significant result at the  $\alpha = 0.05$  level is for the data aggregated over the four sports. Even  
397 this result is not robust, however: just one additional blue win would tip the  $p$ -value over  
398 the significance threshold. In any case, as each hypothesis test is carried out in parallel  
399 with additional tests on (sub-sets of) the same data, the analysis falls squarely within the  
400 setting of multiple hypothesis testing. Therefore, a threshold of  $\alpha = 0.05$  overstates the  
401 likely true statistical significance (discussed in Section S4.2).

402 Furthermore, we note that the  $\chi^2$  test rests on an asymptotic approximation that only  
403 holds for large sample sizes. The binomial test is exact and correct for all sample sizes,  
404 and in its one-sided form it provides a more accurate representation of Hill & Barton’s  
405 [1] hypothesis (i.e.,  $H_A : f_{\text{red}} > 0.5$  vs.  $H_A : f_{\text{red}} \neq 0.5$ ). A final issue is that the data  
406 present structural dependencies, in violation of the independence assumption of standard  
407 hypothesis testing (discussed in Section S4.2).

408 Table S2 summarizes the sign test results for the 2004 data, following the analytical  
409 approach used by Hill & Barton [1]. The test is equivalent to a two-sided binomial test  
410 ( $H_A : f_{\text{red}} \neq 0.5$ ), where the number of successes is  $n_{\text{red}}$  and the number of trials is



Table S1: Number ( $n_{\text{red}}$ ) and fraction ( $f_{\text{red}}$ ) of bouts won by red, total number ( $n$ ), and  $\chi^2$  test results in data for boxing (BOX), taekwondo (TKD), Greco-Roman wrestling (GRW), free-style wrestling (FSW), and aggregated (ALL), at the 2004 Athens Olympics.

| Sport(s) | $n_{\text{red}}$ | $n$ | $f_{\text{red}}$ | $\chi^2$ | d.f. | $p$ -value |
|----------|------------------|-----|------------------|----------|------|------------|
| BOX      | 147              | 267 | 0.551            | 2.73     | 1    | 0.098      |
| TKD      | 43               | 75  | 0.573            | 1.61     | 1    | 0.204      |
| GRW      | 25               | 48  | 0.521            | 0.08     | 1    | 0.773      |
| FSW      | 27               | 51  | 0.529            | 0.18     | 1    | 0.674      |
| ALL      | 242              | 441 | 0.549            | 4.19     | 1    | 0.041      |

411  $n_{\text{red}} + n_{\text{blue}} < n$ , i.e., rounds or weight classes with an equal number of red and blue wins  
 412 are excluded. For both rounds and weight classes,  $f_{\text{red}} = n_{\text{red}} / (n_{\text{red}} + n_{\text{blue}})$  is significantly  
 413 different from 0.5 at the  $\alpha = 0.05$  level. In line with the hypothesis, more present a majority  
 414 of red wins than a majority of blue wins.

415 As above, we note that a one-sided test provides a more accurate representation of Hill  
 416 & Barton’s [1] hypothesis, and that we are in a setting of multiple hypothesis testing, with  
 417 structural dependencies in the data (discussed in Section S4.2). Furthermore, we contend  
 418 that the number of trials to be used in the test is the total number of rounds or weight  
 419 classes  $n$ , rather than  $n_{\text{red}} + n_{\text{blue}}$ . That is, rounds and weight classes with an equal number  
 420 of red and blue wins provide useful information for evaluating the hypothesis, and they  
 421 should not be excluded from analysis. A final issue is that rounds vary greatly in number of  
 422 bouts, both within and between sports. Consequently, the probability that different rounds  
 423 will end with a majority of red wins is not uniform. Similarly, weight classes vary in number  
 424 of bouts, thus the probability that different weight classes will end with a majority of red  
 425 wins is also not uniform.

Table S2: Number of rounds and weight classes with  $> 50\%$  of red ( $n_{\text{red}}$ ) or blue ( $n_{\text{blue}}$ ) wins, total number ( $n$ ), and sign test results in data aggregated for boxing, taekwondo, Greco-Roman wrestling, and free-style wrestling, at the 2004 Athens Olympics.

| Test           | $n_{\text{red}}$ | $n_{\text{blue}}$ | $n$ | $p$ -value |
|----------------|------------------|-------------------|-----|------------|
| Rounds         | 16               | 4                 | 21  | 0.012      |
| Weight classes | 19               | 6                 | 29  | 0.015      |

426 Tables S3 and S4 summarize the  $\chi^2$  and sign test results for the 2008 data, reported  
 427 here only for consistency with Hill & Barton’s [1] analysis. The fraction of bouts won  
 428 by red  $f_{\text{red}} < 0.5$  in all cases, except taekwondo (with an “excess” of only one red win;  
 429 Section S3.2.2), and more rounds and weight classes present a majority of blue wins than

430 a majority of red wins. Across the two tests, the only significant result at the  $\alpha = 0.05$   
 431 level is for bouts in free-style wrestling, but in the opposite direction than predicted by the  
 432 hypothesis (Table S3).

Table S3: Number ( $n_{\text{red}}$ ) and fraction ( $f_{\text{red}}$ ) of bouts won by red, total number ( $n$ ), and  $\chi^2$  test results in data for boxing (BOX), taekwondo (TKD), Greco-Roman wrestling (GRW), free-style wrestling (FSW), and aggregated (ALL), at the 2008 Beijing Olympics.

| Sport(s) | $n_{\text{red}}$ | $n$ | $f_{\text{red}}$ | $\chi^2$ | d.f. | $p$ -value |
|----------|------------------|-----|------------------|----------|------|------------|
| BOX      | 133              | 270 | 0.493            | 0.06     | 1    | 0.808      |
| TKD      | 38               | 75  | 0.507            | 0.01     | 1    | 0.908      |
| GRW      | 80               | 164 | 0.488            | 0.10     | 1    | 0.755      |
| FSW      | 67               | 164 | 0.409            | 5.49     | 1    | 0.019      |
| ALL      | 318              | 673 | 0.473            | 2.03     | 1    | 0.154      |

Table S4: Number of rounds and weight classes with  $> 50\%$  of red ( $n_{\text{red}}$ ) or blue ( $n_{\text{blue}}$ ) wins, total number ( $n$ ), and sign test results in data aggregated for boxing, taekwondo, Greco-Roman wrestling, and free-style wrestling, at the 2008 Beijing Olympics.

| Test           | $n_{\text{red}}$ | $n_{\text{blue}}$ | $n$ | $p$ -value |
|----------------|------------------|-------------------|-----|------------|
| Rounds         | 8                | 13                | 25  | 0.383      |
| Weight classes | 11               | 17                | 29  | 0.345      |

433 Overall, these results call into question the main claim of a red effect in Hill & Barton's  
 434 [1] analysis. First, the tests used are mis-specified in several respects, outlined above.  
 435 Second, even ignoring all issues with test mis-specification, the pattern reported for the  
 436 2004 data is not robust, with statistical significance hinging on only one or two observations  
 437 (in the case of bouts and rounds/weight classes, respectively). In any case, the pattern  
 438 does not hold in the equivalent 2008 data, even replicating the exact analytical approach  
 439 used by Hill & Barton [1].

#### 440 S4.1.2 Corollary

441 Analogous considerations apply to Hill & Barton's [1] skill-based analysis (which we have  
 442 been able to replicate only approximately, due to ambiguities in processing of the data).  
 443 A first issue relates to sample size: the analysis involves dividing the  $n = 441$  bouts in  
 444 the aggregated 2004 data into four sub-samples of approximately 110 bouts each, likely  
 445 reducing the statistical power of the hypothesis tests. A second issue is that the sub-  
 446 samples retain the structural dependencies of the full sample. A third issue is that, as  
 447 above, we are in a setting of multiple hypothesis testing (i.e., four separate tests, one for

448 each sub-sample). These considerations suggest that the pattern reported by Hill & Barton  
449 [1] is confounded by both Type I and Type II errors, at rates that are unknown or difficult  
450 to estimate.

451 A fourth and final issue applies specifically to the skill-based analysis. Using points as  
452 a proxy for skill, and aggregating the information over the four sports, is an uncontrolled  
453 procedure with unknown properties. The results yielded by such a procedure are, at best,  
454 of difficult interpretation; at worst, they are meaningless. This is because point-scoring  
455 systems vary greatly across sports, and the number of points scored is not “linear” with  
456 respect to skill. For example, boxing presents the simplest scoring system, which assigns one  
457 point for a punch meeting specific requirements that lands to the head or torso. However,  
458 even in this case judges rely on additional considerations (e.g., better style, better defense)  
459 to break ties. Thus, the assumption of a “linear” relationship between the number of points  
460 scored by a contestant and his skill is questionable.

461 The assumption is even less tenable for the scoring systems of taekwondo and wrestling,  
462 where different “actions” are assigned different number of points, with an elaborate set of  
463 additional considerations used to break ties (see e.g., the diverse set of potential bout  
464 outcomes in wrestling; Section S2.4). Additional complications include the deduction of  
465 points in taekwondo (which may result in a contestant ending a bout with an overall  
466 negative score), and the distinction between technical vs. classification points in wrestling  
467 (which Hill & Barton [1] sidestep by adding the two). In fact, in wrestling a bout is  
468 won by the contestant who prevailed in two of the three periods constituting the bout;  
469 consequently, the winner may actually have an overall lower score than his opponent. These  
470 and related factors are likely to crucially compromise any attempt to extract information  
471 about variation in contestant skill from the points scored. We contend that the results of  
472 Hill & Barton’s [1] skill-based analysis must consequently be discounted.

## 473 **S4.2 Alternative analytical approach**

474 Here we implement an alternative approach to the analysis underpinning Hill & Barton’s  
475 [1] main claim (Section S4.1.1). Our approach is in two parts. First, we test for an effect of  
476 red in the 2004 and the 2008 data using a series of one-sided binomial tests (Section S4.2.1).  
477 Second, we study the rates of Type I and Type II error associated with the analysis, linked  
478 to the multiple hypothesis testing and to the variable sample sizes (Section S4.2.2).

479 While this approach addresses several of the issues with test mis-specification in Hill  
480 & Barton’s [1] analysis, we note that it does not resolve one fundamental issue, related  
481 to structural dependencies in the data. It is a feature of single-elimination tournament  
482 competitions that winning contestants compete in multiple rounds (e.g., as they progress  
483 to the final; Fig. 1b in the main text). Consequently, individual bouts cannot be considered  
484 independent observations for the purpose of hypothesis testing. Specific features of the  
485 tournament structure may lead to associations between a contestant’s skill (and hence his  
486 probability of winning) and color, creating a bias towards wins by one color when the data

487 are aggregated over multiple rounds, competitions, and so on [2]. However, any such bias  
488 is not easily disentangled from a “real” effect of red, as hypothesized by Hill & Barton  
489 [1], in observational data. For example, excluding specific bouts from analysis to remove  
490 potential biases [e.g., 2, 4, 5] may lead to a reduction in statistical power. Therefore, we  
491 turn to simulation in Section S5 to investigate the bias arising from non-independence in  
492 the data-generating process.

#### 493 **S4.2.1 Binomial tests**

494 Following Hill & Barton’s [1] approach (Section S4.1.1), we test for an effect in the fraction  
495 of bouts won by red (separately for individual sports, and aggregated over the four sports  
496 by year), and in the fraction of rounds and weight classes with a majority of red wins  
497 (aggregated over the four sports by year). Additionally, we test for an effect in the fraction  
498 of bouts won by red, aggregated over the four sports and over the two years; this test  
499 maximises the sample size. Finally, we test for an effect in the fraction of bouts won  
500 by red excluding data for wrestling, aggregated over the two remaining sports (boxing,  
501 taekwondo) by year and over the two years. Our simulation results show that exclusion of  
502 the wrestling data minimizes the effects of bias in the data-generating process (Section S5).

503 This gives a total of 18 one-sided binomial tests ( $H_0 : f_{\text{red}} \leq 0.5; H_A : f_{\text{red}} > 0.5$ ),  
504 summarized in Table S5. Only 3 results are significant at the  $\alpha = 0.05$  level, relating  
505 to (i) the fraction of bouts won by red, aggregated over the four sports, in 2004, (ii) the  
506 fraction of bouts won by red, aggregated over boxing and taekwondo, in 2004, and (iii)  
507 the fraction of rounds with a majority of red wins, aggregated over the four sports, also  
508 in 2004. The latter result is of difficult interpretation due to variation in the number of  
509 bouts for different rounds, both within and across sports (Section S4.1.1). Furthermore,  
510 we emphasize that we are in a setting of multiple hypothesis testing, hence a threshold of  
511  $\alpha = 0.05$  overstates the likely true statistical significance, i.e., we may be making a Type  
512 I error of incorrectly rejecting the null hypothesis in these 3 cases. At the same time, we  
513 may be making a Type II error of not rejecting the null hypothesis in the other cases. We  
514 investigate these issues in detail below.

#### 515 **S4.2.2 Type I and Type II error rates**

516 In statistical hypothesis tests, the critical value  $\alpha$  is used as a threshold to decide whether  
517 a given pattern is statistically unlikely under a particular null hypothesis  $H_0$ . It is thus  
518 the probability of a Type I error, i.e., of incorrectly rejecting the null hypothesis when in  
519 fact the null is true. If the  $p$ -value exceeds  $\alpha$ , then the pattern is plausibly within the  
520 range of natural variation under the null hypothesis. In our case, natural variation around  
521  $f_{\text{red}} = 0.5$ , and  $\alpha$  is the probability that we find an effect of red when no such effect exists  
522 in the underlying data-generating process.

523 The structure of the analysis underpinning Hill & Barton’s [1] main claim is an example

Table S5: Results of one-sided binomial tests of a red effect in data for boxing (BOX), taekwondo (TKD), Greco-Roman wrestling (GRW), free-style wrestling (FSW), and aggregated over the four sports (ALL), at the 2004 Athens and 2008 Beijing Olympics. Tests denoted “bouts” compare the number of bouts won by red,  $n_{\text{red}}$ , to the  $n$  total bouts. Tests denoted “rounds” compare the number of rounds with a majority of red wins,  $n_{\text{red}}$ , to the  $n$  total rounds. Tests denoted “weight classes” compare the number of weight classes with a majority of red wins,  $n_{\text{red}}$ , to the  $n$  total weight classes. In all cases,  $f_{\text{red}} = n_{\text{red}}/n$ .

| Year | Test           | Sport(s) | $n_{\text{red}}$ | $n$  | $f_{\text{red}}$ | $p$ -value |
|------|----------------|----------|------------------|------|------------------|------------|
| 2004 | Bouts          | BOX      | 147              | 267  | 0.551            | 0.056      |
| 2004 | Bouts          | TKD      | 43               | 75   | 0.573            | 0.124      |
| 2004 | Bouts          | GRW      | 25               | 48   | 0.521            | 0.443      |
| 2004 | Bouts          | FSW      | 27               | 51   | 0.529            | 0.390      |
| 2004 | Bouts          | ALL      | 242              | 441  | 0.549            | 0.023      |
| 2004 | Bouts          | BOX, TKD | 190              | 342  | 0.556            | 0.023      |
| 2004 | Rounds         | ALL      | 16               | 21   | 0.762            | 0.013      |
| 2004 | Weight classes | ALL      | 19               | 29   | 0.655            | 0.068      |
| 2008 | Bouts          | BOX      | 133              | 270  | 0.493            | 0.620      |
| 2008 | Bouts          | TKD      | 38               | 75   | 0.507            | 0.500      |
| 2008 | Bouts          | GRW      | 80               | 164  | 0.488            | 0.652      |
| 2008 | Bouts          | FSW      | 67               | 164  | 0.409            | 0.992      |
| 2008 | Bouts          | ALL      | 318              | 673  | 0.473            | 0.929      |
| 2008 | Bouts          | BOX, TKD | 171              | 345  | 0.496            | 0.585      |
| 2008 | Rounds         | ALL      | 8                | 25   | 0.320            | 0.978      |
| 2008 | Weight classes | ALL      | 11               | 29   | 0.379            | 0.932      |
| Both | Bouts          | ALL      | 560              | 1114 | 0.503            | 0.440      |
| Both | Bouts          | BOX, TKD | 361              | 687  | 0.525            | 0.097      |

524 of multiple hypothesis testing, in which more than one test is applied to different aspects  
525 of the same data. For example, in our analytical approach, which follows closely Hill &  
526 Barton’s [1], there are 18 binomial tests, with  $\alpha = 0.05$  (Section S4.2.1). If  $\alpha$  is the desired  
527 rate of false positives, then in a setting of multiple hypothesis testing the significance  
528 threshold to be applied to each test is  $\alpha_c < \alpha$ , i.e., a lower value that depends on the  
529 number of tests being conducted. Thus, using a threshold of  $\alpha = 0.05$  to evaluate the  
530 tests in Table S5 overstates the likely true statistical significance, i.e., we may be making  
531 a Type I error of incorrectly rejecting the null hypothesis in cases where the  $p$ -value does  
532 not exceed the threshold.

533 There is a rich literature on corrections for multiple hypothesis testing [6]. A standard  
534 approach is the well-known Bonferroni correction [7], which gives  $\alpha_c = \alpha/m$  for  $m$  tests.  
535 This is not the most conservative correction, but it is widely used and its theoretical

536 deficiencies are well understood [6]. With  $m = 18$ , the Bonferroni-adjusted significance  
537 threshold for the tests in Table S5 is  $\alpha_c = 0.003$ . None of the results are significant  
538 under this threshold. We emphasize that analogous reasoning applies to the 11 hypothesis  
539 tests (seven underpinning the main claim, four underpinning the corollary; Section S4.1)  
540 reported by Hill & Barton [1].

541 In failing to reject the null hypothesis, could we be making a false negative error instead?  
542  $\beta$  represents the probability of a Type II error, i.e., of incorrectly failing to reject the null  
543 hypothesis  $H_0$  when in fact it is false and the alternative hypothesis  $H_A$  is the correct  
544 data-generating process. The power of a test is defined as  $1 - \beta$ , and a value of 0.8 is a  
545 conventional threshold for a test with sufficient power to distinguish between the null and  
546 the alternative hypotheses.

547 For each of the statistical tests in Table S5, we conducted two power analyses, separately  
548 for  $\alpha = 0.05$  and for  $\alpha_c = 0.003$  (Tables S6 and S7, respectively). First, we calculated the  
549 parameter  $f_{\text{red,alt}}$  of the most likely alternative model, if in fact we have committed a Type  
550 II error in failing to reject the null hypothesis (no effect of red). This parameter thus  
551 represents the smallest effect of red that is outside the range of natural variation under the  
552 null, given the size of the sample. If the null is correct, then as the sample size increases,  
553  $f_{\text{red,alt}}$  necessarily converges on 0.5. For large values of  $n$ ,  $f_{\text{red,alt}}$  may be very close to 0.5  
554 and would represent a statistically significant effect, even if it is a very small one.

555 Second, we calculated the smallest parameter  $f_{\text{red,pt}}$  for which we have sufficient power  
556 to rule out as an alternative, in the case where we committed a Type II error. As discussed  
557 above, under  $\alpha_c$  we fail to reject the null hypothesis in all of the tests we conducted  
558 (Table S5). Thus,  $f_{\text{red,pt}}$  can be interpreted as an upper bound on the possible effect size,  
559 and  $f_{\text{red,alt}}$  as a lower bound. Their difference  $\Delta f$  can then be interpreted as the largest  
560 possible effect of red given the observed data, above and beyond the range of natural  
561 variation under the null.

562 That is, suppose the true data-generating process includes an effect of red, and suppose  
563 that by chance, our observed data  $f_{\text{red}}$ , which are drawn from this process, are sufficiently  
564 close to 0.5 that we fail to reject the null hypothesis because the observed fraction is not  
565 statistically unusual relative to the null (although it may be unusual relative to the true  
566 parameter of the data-generating process). In this case, we have made a Type II error.  
567 However, given  $f_{\text{red}}$ , we can calculate how much statistical power it has against different  
568 choices of red effect  $f_{\text{red,pt}} > 0.5$ . The bigger the choice of  $f_{\text{red,pt}}$ , the more statistical power  
569 our observed  $f_{\text{red}}$  provides against it. In this way, for each candidate choice of  $f_{\text{red,pt}}$ , we  
570 can calculate the probability of observing  $f_{\text{red}}$ . The less likely our observed  $f_{\text{red}}$  is under  
571 a particular  $f_{\text{red,pt}}$ , the more statistical power we have against it. The more statistical  
572 power, the less likely it is that that parameter could have generated our observed data.

Table S6: Results of power analyses of one-sided binomial tests of a red effect in data for boxing (BOX), taekwondo (TKD), Greco-Roman wrestling (GRW), free-style wrestling (FSW), and aggregated over the four sports (ALL), at the 2004 Athens and 2008 Beijing Olympics. Tests denoted “bouts” compare the number of bouts won by red,  $n_{\text{red}}$ , to the  $n$  total bouts. Tests denoted “rounds” compare the number of rounds with a majority of red wins,  $n_{\text{red}}$ , to the  $n$  total rounds. Tests denoted “weight classes” compare the number of weight classes with a majority of red wins,  $n_{\text{red}}$ , to the  $n$  total weight classes. In all cases,  $f_{\text{red}} = n_{\text{red}}/n$ .  $k$  is the critical value for a one-sided binomial test ( $H_0 : f_{\text{red}} \leq 0.5; H_A : f_{\text{red}} > 0.5$ ), i.e., the test will be significant at  $\alpha$  for  $n_{\text{red}} \geq k + 1$ ;  $f_{\text{red,alt}} = (k + 1)/n$ . Power is the power of the test.  $n_{\text{pt}}$  is the smallest value of  $n_{\text{red}}$  consistent with a power threshold of 0.80;  $f_{\text{red,pt}} = n_{\text{pt}}/n$ .  $\Delta f = f_{\text{red,pt}} - f_{\text{red,alt}}$ .

| Year | Test           | Sport(s) | $n_{\text{red}}$ | $n$  | $f_{\text{red}}$ | $k$ | $f_{\text{red,alt}}$ | Power | $n_{\text{pt}}$ | $f_{\text{red,pt}}$ | $\Delta f$ |
|------|----------------|----------|------------------|------|------------------|-----|----------------------|-------|-----------------|---------------------|------------|
| 2004 | Bouts          | BOX      | 147              | 267  | 0.551            | 147 | 0.554                | 0.476 | 155             | 0.581               | 0.026      |
| 2004 | Bouts          | TKD      | 43               | 75   | 0.573            | 45  | 0.613                | 0.281 | 49              | 0.653               | 0.040      |
| 2004 | Bouts          | GRW      | 25               | 48   | 0.521            | 30  | 0.646                | 0.055 | 34              | 0.708               | 0.062      |
| 2004 | Bouts          | FSW      | 27               | 51   | 0.529            | 31  | 0.627                | 0.103 | 35              | 0.686               | 0.059      |
| 2004 | Bouts          | ALL      | 242              | 441  | 0.549            | 238 | 0.542                | 0.632 | 248             | 0.562               | 0.020      |
| 2004 | Bouts          | BOX, TKD | 190              | 342  | 0.556            | 186 | 0.547                | 0.649 | 195             | 0.570               | 0.023      |
| 2004 | Rounds         | ALL      | 16               | 21   | 0.762            | 14  | 0.714                | 0.784 | 17              | 0.810               | 0.095      |
| 2004 | Weight classes | ALL      | 19               | 29   | 0.655            | 19  | 0.690                | 0.431 | 22              | 0.759               | 0.069      |
| 2008 | Bouts          | BOX      | 133              | 270  | 0.493            | 149 | 0.556                | 0.022 | 157             | 0.581               | 0.026      |
| 2008 | Bouts          | TKD      | 38               | 75   | 0.507            | 45  | 0.613                | 0.041 | 49              | 0.653               | 0.040      |
| 2008 | Bouts          | GRW      | 80               | 164  | 0.488            | 93  | 0.573                | 0.017 | 99              | 0.604               | 0.030      |
| 2008 | Bouts          | FSW      | 67               | 164  | 0.409            | 93  | 0.573                | 0.000 | 99              | 0.604               | 0.030      |
| 2008 | Bouts          | ALL      | 318              | 673  | 0.473            | 358 | 0.533                | 0.001 | 370             | 0.550               | 0.016      |
| 2008 | Bouts          | BOX, TKD | 171              | 345  | 0.496            | 188 | 0.548                | 0.030 | 197             | 0.571               | 0.023      |
| 2008 | Rounds         | ALL      | 8                | 25   | 0.320            | 17  | 0.720                | 0.000 | 20              | 0.800               | 0.080      |
| 2008 | Weight classes | ALL      | 11               | 29   | 0.379            | 19  | 0.690                | 0.001 | 22              | 0.759               | 0.069      |
| Both | Bouts          | ALL      | 560              | 1114 | 0.503            | 584 | 0.525                | 0.071 | 599             | 0.538               | 0.013      |
| Both | Bouts          | BOX, TKD | 361              | 687  | 0.525            | 365 | 0.533                | 0.366 | 377             | 0.549               | 0.016      |

Table S7: Results of power analyses of one-sided binomial tests of a red effect in data for boxing (BOX), taekwondo (TKD), Greco-Roman wrestling (GRW), free-style wrestling (FSW), and aggregated over the four sports (ALL), at the 2004 Athens and 2008 Beijing Olympics. Tests denoted “bouts” compare the number of bouts won by red,  $n_{\text{red}}$ , to the  $n$  total bouts. Tests denoted “rounds” compare the number of rounds with a majority of red wins,  $n_{\text{red}}$ , to the  $n$  total rounds. Tests denoted “weight classes” compare the number of weight classes with a majority of red wins,  $n_{\text{red}}$ , to the  $n$  total weight classes. In all cases,  $f_{\text{red}} = n_{\text{red}}/n$ .  $k$  is the critical value for a one-sided binomial test ( $H_0 : f_{\text{red}} \leq 0.5; H_A : f_{\text{red}} > 0.5$ ), i.e., the test will be significant at  $\alpha_c$  for  $n_{\text{red}} \geq k + 1$ ;  $f_{\text{red,alt}} = (k + 1)/n$ . Power is the power of the test.  $n_{\text{pt}}$  is the smallest value of  $n_{\text{red}}$  consistent with a power threshold of 0.80;  $f_{\text{red,pt}} = n_{\text{pt}}/n$ .  $\Delta f = f_{\text{red,pt}} - f_{\text{red,alt}}$ .

| Year | Test           | Sport(s) | $n_{\text{red}}$ | $n$  | $f_{\text{red}}$ | $k$ | $f_{\text{red,alt}}$ | Power | $n_{\text{pt}}$ | $f_{\text{red,pt}}$ | $\Delta f$ |
|------|----------------|----------|------------------|------|------------------|-----|----------------------|-------|-----------------|---------------------|------------|
| 2004 | Bouts          | BOX      | 147              | 267  | 0.551            | 156 | 0.588                | 0.121 | 164             | 0.614               | 0.026      |
| 2004 | Bouts          | TKD      | 43               | 75   | 0.573            | 49  | 0.667                | 0.063 | 53              | 0.707               | 0.040      |
| 2004 | Bouts          | GRW      | 25               | 48   | 0.521            | 33  | 0.708                | 0.006 | 36              | 0.750               | 0.042      |
| 2004 | Bouts          | FSW      | 27               | 51   | 0.529            | 35  | 0.706                | 0.008 | 39              | 0.765               | 0.059      |
| 2004 | Bouts          | ALL      | 242              | 441  | 0.549            | 250 | 0.569                | 0.208 | 260             | 0.590               | 0.020      |
| 2004 | Bouts          | BOX, TKD | 190              | 342  | 0.556            | 197 | 0.579                | 0.207 | 206             | 0.602               | 0.023      |
| 2004 | Rounds         | ALL      | 16               | 21   | 0.762            | 17  | 0.857                | 0.227 | 19              | 0.905               | 0.048      |
| 2004 | Weight classes | ALL      | 19               | 29   | 0.655            | 22  | 0.793                | 0.082 | 25              | 0.862               | 0.069      |
| 2008 | Bouts          | BOX      | 133              | 270  | 0.493            | 158 | 0.589                | 0.001 | 166             | 0.615               | 0.026      |
| 2008 | Bouts          | TKD      | 38               | 75   | 0.507            | 49  | 0.667                | 0.004 | 53              | 0.707               | 0.040      |
| 2008 | Bouts          | GRW      | 80               | 164  | 0.488            | 100 | 0.616                | 0.001 | 106             | 0.646               | 0.030      |
| 2008 | Bouts          | FSW      | 67               | 164  | 0.409            | 100 | 0.616                | 0.000 | 106             | 0.646               | 0.030      |
| 2008 | Bouts          | ALL      | 318              | 673  | 0.473            | 372 | 0.554                | 0.000 | 384             | 0.571               | 0.016      |
| 2008 | Bouts          | BOX, TKD | 171              | 345  | 0.496            | 198 | 0.577                | 0.002 | 207             | 0.600               | 0.023      |
| 2008 | Rounds         | ALL      | 8                | 25   | 0.320            | 19  | 0.800                | 0.000 | 22              | 0.880               | 0.080      |
| 2008 | Weight classes | ALL      | 11               | 29   | 0.379            | 22  | 0.793                | 0.000 | 25              | 0.862               | 0.069      |
| Both | Bouts          | ALL      | 560              | 1114 | 0.503            | 603 | 0.542                | 0.005 | 618             | 0.555               | 0.013      |
| Both | Bouts          | BOX, TKD | 361              | 687  | 0.525            | 380 | 0.555                | 0.068 | 392             | 0.571               | 0.016      |



573 Following standard conventions, any choice of  $f_{\text{red,pt}}$  against which we have power of at  
574 least 0.8 can be ruled out by the value of  $f_{\text{red}}$  we did observe. That is, the observed value  
575 of  $f_{\text{red}}$  allows us to rule out extreme scenarios (strong red effect) because they would be  
576 unlikely to produce an observed  $f_{\text{red}}$  so far below  $f_{\text{red,pt}}$ . The smallest value of  $f_{\text{red,pt}}$  that  
577 we cannot rule out in this way is the largest value (i.e., the biggest effect) that is consistent  
578 with our observed value  $f_{\text{red}}$  under these rules (which assume that we have committed a  
579 Type II error).

580 Now we know how big a red effect cannot be ruled out by the observed  $f_{\text{red}}$ , but we  
581 would like to estimate the impact of this effect on our observed data. The null hypothesis  
582 of  $f_{\text{red}} = 0.5$  has a range of natural variation, and this is naturally defined as all values  
583 of  $f_{\text{red}}$  below the critical value. Any observed outcomes that fall within this region can  
584 be attributed to the null. Variation above and beyond this region can be attributed to an  
585 effect of red. The limit of this variation is precisely what we have calculated above, and the  
586 difference between the upper limit of natural variation, given by the null and the sample  
587 size, and the upper limit of a possible effect of red, permitted by the observed data  $f_{\text{red}}$ , is  
588 the maximum impact that red could be having on the observed data.

589 Across all of our tests, the values for  $\Delta f$  are all small, indicating that if an effect of  
590 red does exist in these data, it is a modest one, accounting for altering the outcomes of  
591 only a handful of bouts. In particular, in the data aggregated over the four sports and  
592 over the two years,  $\Delta f = 0.013$ , indicating that at most wearing red could be altering the  
593 outcomes of about 1.3% of bouts. We find similar results when we focus only on the more  
594 unbiased tournaments, namely boxing and taekwondo (Tables S6 and S7). We emphasize  
595 that these values do not take into account the potential biases arising from asymmetries  
596 in tournament structure, thus they may even overestimate the true impact.

## 597 **S5 Monte Carlo simulation of competition**

598 Hypothesis tests like the  $\chi^2$ , sign, and binomial tests make the standard assumption that  
599 observations are independent and identically distributed (i.i.d.). As discussed in Sec-  
600 tion S4.2, individual bouts in a single-elimination tournament cannot be considered in-  
601 dependent observations for the purpose of hypothesis testing. Here we use simulation to  
602 investigate the bias arising from non-independence in the data-generating process. Specif-  
603 ically, we focus on two sources of incompleteness in the tournament structures for the four  
604 sports in the 2004 Athens and 2008 Beijing Olympics: byes and walkovers (Sections S2  
605 and S3). We show that incompleteness in the tournament structure, coupled with variance  
606 in skill among the contestants, can induce a bias that shifts the null distribution (no effect  
607 of red) away from  $f_{\text{red}} = 0.5$ .

608 The first source of incompleteness comes from the number of contestants in the outer-  
609 most round in a competition tree being different from a power of 2 (Fig. 1b in main text).  
610 In this case, a subset of contestants are awarded byes, which effectively allows them to skip  
611 to the next round. If  $n$  is the number of contestants in a given round, the number of byes  
612 awarded is  $\delta = 2^{\lceil \log_2 n \rceil} - n$ , and the number of contestants competing in that round is  $n - \delta$ .  
613 For example, the average number of byes per weight class in the 2004 data is  $\langle \delta \rangle = 3.4$   
614 for boxing, 1.6 for Greco-Roman wrestling, and 1.3 for free-style wrestling (taekwondo has  
615 no byes because the number of contestants per weight class is 16, and thus a power of 2;  
616 Section S2.2). Byes are “stacked” either at the top of the tree’s upper branch (2004 and  
617 2008 boxing, 2008 wrestling; Sections S2.1 and S2.3) or at the bottom of the lower branch  
618 (2004 wrestling; Section S2.3).

619 The second source of incompleteness comes from bouts won by walkover, in which a  
620 contestant fails to show up for a bout or withdraws, leading his opponent to win by default;  
621 for example, this was common in the 5–6 final round of 2004 wrestling (Section S2.3). These  
622 bouts are reasonably excluded from analysis as their outcome is unlikely to be influenced  
623 by the colors worn by the contestants [1]. Unlike in the case of byes, there is no systematic  
624 pattern governing the position of bouts won by walkover. Across all sports, there were 16  
625 walkovers in 2004 and four in 2008 (Section S3).

### 626 **S5.1 Simulation specification**

627 To control for structural sources of non-i.i.d. behavior in the data-generating process for the  
628 correct null distribution, we implemented an exact Monte Carlo simulation of competition  
629 on the observed tournament structures for each weight class in each sport, including the  
630 specific asymmetries generated by byes and walkovers observed in each weight class. This  
631 simulation allows us to numerically estimate the correct distribution for the null hypothesis  
632 (no effect of red) within an individual bout.

633 The simulation was parameterized in a way that allows us to systematically vary the  
634 skill levels of the competitors. Specifically, for each simulation, each competitor is assigned

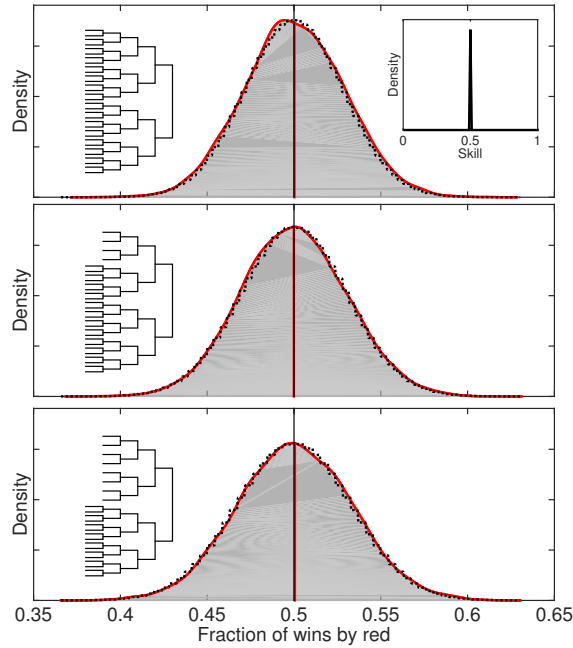

Figure S1: Fraction of red wins under Bradley–Terry competition on tournaments with different degrees of incompleteness due to byes (left insets), when all competitors are equally skilled (right inset, top panel), for  $10^4$  repetitions. Color assignment is red/blue to the top/bottom positions of the bracket in each bout. Regardless of the degree of incompleteness, the null distribution takes the shape of a binomial distribution (dotted line) centered at  $f_{\text{red}} = 0.5$ .

635 a latent skill value  $x$  drawn from a symmetric Beta distribution  $x \sim \text{Beta}(\beta, \beta)$  over the unit  
 636 interval, but independently of the color initially assigned to the competitor. A competitor’s  
 637 skill value is fixed over all bouts in which he participates. In the limit of  $\beta \rightarrow \infty$ , this  
 638 distribution converges on a delta function at  $x = 0.5$ , meaning that all competitors have  
 639 equal skill. For finite values of  $\beta$ , the distribution has non-zero variance but is symmetric  
 640 about  $x = 0.5$ . When  $\beta = 1$ ,  $x \sim \text{Uniform}(0, 1)$ , and for  $\beta < 1$ , the distribution exhibits a  
 641 symmetric “U” shape, with the modal skill values being close to 0 or 1.

642 When two competitors  $r$  and  $b$  face off, the outcome is determined by a standard  
 643 Bradley–Terry model of competition [8], in which the probability that a competitor wearing  
 644 red wins is  $x_r/(x_r + x_b)$ . The winner of the bout advances to the next relevant position  
 645 in the tournament. If a particular bout was won by walkover in the empirical data, then

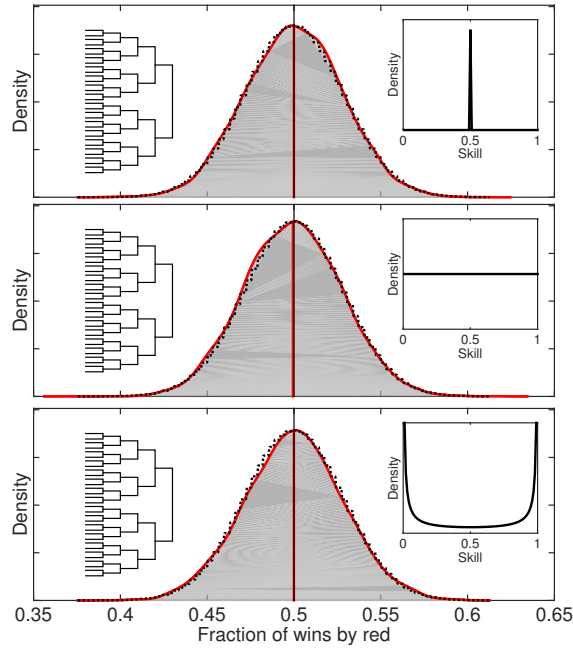

Figure S2: Fraction of red wins under Bradley–Terry competition on three complete tournaments (left insets), when competitors have unequal skills (right insets), for  $10^4$  repetitions. Color assignment is red/blue to the top/bottom positions of the bracket in each bout. Regardless of the variance in competitor skill, the null distribution takes the shape of a binomial distribution (dotted line) centered at  $f_{\text{red}} = 0.5$ .

646 the corresponding winner in the simulation automatically wins the simulated bout and  
 647 advances. If additional bouts were a part of a particular tournament, these were included,  
 648 with competitors allocated to these bouts according to the same rules as were applied in  
 649 the tournament (e.g., repechage rounds in 2004 and 2008 taekwondo and in 2008 wrestling;  
 650 Sections S2.2 and S2.3).

651 We use the above Monte Carlo simulation, with at least  $10^4$  repetitions, to numerically  
 652 estimate the correct null distribution. This distribution can be used to calculate a standard  
 653  $p$ -value under a hypothesis of a particular distribution of competitor skills. It can also be  
 654 used to quantify the impact of different seeding procedures (e.g., seeding by skill) on the  
 655 null distribution, which can shift the fraction of red wins away from 0.5 [2].

656 Finally, the simulation can be used to characterize the bias induced in the distribution  
 657 of the fraction of red wins under the null hypothesis (no effect of red) by asymmetries

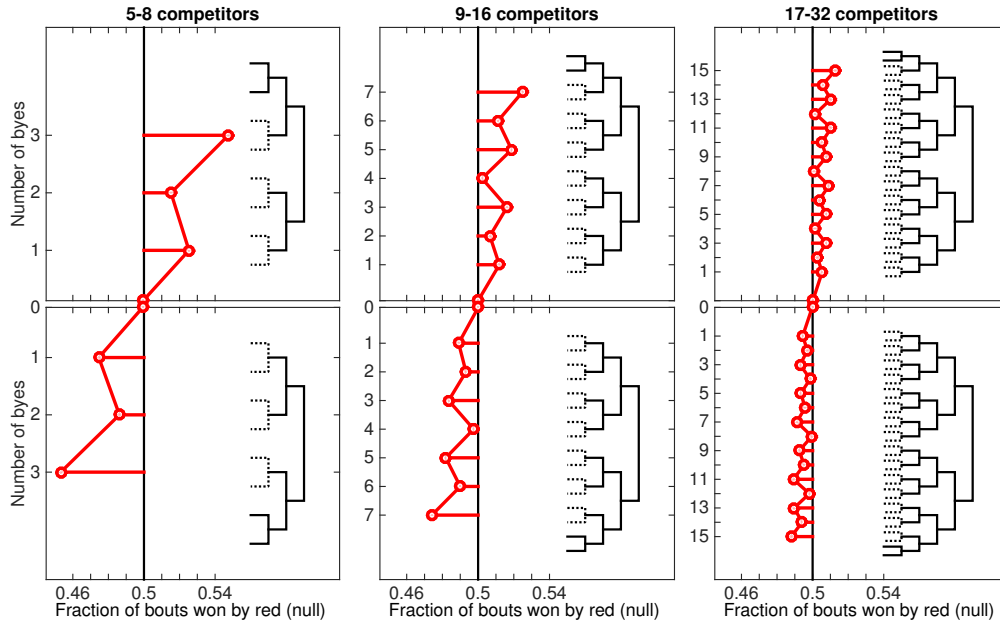

Figure S3: Fraction of red wins under the null hypothesis (no effect of red) on tournaments with 5–8, 9–16, and 17–32 competitors, covering all possible number of byes in the outermost round. Byes are stacked either at the bottom of the round (and hence drawn beginning from the “lowest” bout in the round; upper panels) or at the top (and hence drawn beginning from the “highest” bout in the round; lower panels). Across all simulations, the skill distribution is fixed with  $\beta = 0.1$  (the largest level of variance shown in Figs. 1c,d in the main text). Color assignment is red/blue to the top/bottom positions of the bracket in each bout. Dots show the mean fraction under  $10^4$  repetitions.

658 in the tournament structure. For instance, Figs. S1 and S2 show that when competitors  
659 with equal skill compete in an incomplete tournament, or when competitors with unequal  
660 skill compete in a complete tournament, the null distribution of the fraction of red wins  
661 is given by a binomial distribution centered at  $f_{\text{red}} = 0.5$ . In contrast, Fig. S3 shows that  
662 when competitors have unequal skill and compete in an incomplete tournament, the null  
663 distribution is shifted away from  $f_{\text{red}} = 0.5$  by an amount that varies non-trivially with (i)  
664 the number of competitors and (ii) the number of byes in the outermost round. However,  
665 the direction of the bias relative to 0.5 depends only on whether the byes are stacked at  
666 the bottom of the round, which leads to  $f_{\text{red}} > 0.5$  (i.e., more wins by red), or at the top  
667 of the round, which leads to  $f_{\text{red}} < 0.5$  (i.e., more wins by blue).

668 **S5.2 Simulation results**

669 To characterize the causal role that tournament asymmetries play in inducing a bias to-  
 670 wards one color, we compared the above simulation, on real tournament structures, with an  
 671 identical simulation in which the empirical tournament asymmetries were removed. That  
 672 is, in this second simulation, no byes or walkovers were allowed and every weight class tour-  
 673 nament was complete and symmetric. Symmetrizing the tournament structures necessarily  
 674 adds bouts, thereby increasing the simulated sample size. To compensate, we pruned a  
 675 corresponding number of bouts from locations of symmetry within the tournament, e.g.,  
 676 the final (gold) round in any sport, the 5–6 final round in 2004 wrestling, or an entire  
 677 repechage tournament in 2004 and 2008 taekwondo and 2008 wrestling (Section S2).

678 Fig. 1c,d in the main text shows how the location of the null distribution varies as  
 679 a function of competitor skill variance for both simulations, for  $10^5$  repetitions for the  
 680 2004 and the 2008 tournament structures. Clearly, the location of the distribution shifts  
 681 substantially in the presence of tournament asymmetries, but remains centered at  $f_{\text{red}} = 0.5$   
 682 when asymmetries are absent. That is, tournament asymmetries induce a bias in the null  
 683 distribution, generating a tendency for red to win more often in 2004, and for blue to win  
 684 more often in 2008.

685 Most of these deviations are driven by the wrestling tournament structures, which  
 686 exhibit large degrees of asymmetry in both 2004 and 2008. For a tournament with  $n$   
 687 contestants and  $\delta$  byes, the outermost round of competition will have  $n - \delta$  contestants,  
 688 and thus a “completeness” fraction linked to byes of  $\rho = (n - \delta)/2^{\lceil \log_2 n \rceil}$ . The average  
 689 value of  $\rho$  across weight classes in a sport provides a simple measure of how systematically  
 690 asymmetric its tournaments are. The table below gives these calculated values for the four  
 691 sports in 2004 and 2008.

| Sport | Year | $\langle \rho \rangle$ | Year | $\langle \rho \rangle$ |
|-------|------|------------------------|------|------------------------|
| BOX   | 2004 | 0.79                   | 2008 | 0.79                   |
| TKD   | 2004 | 1.00                   | 2008 | 1.00                   |
| GRW   | 2004 | 0.61                   | 2008 | 0.24                   |
| FSW   | 2004 | 0.68                   | 2008 | 0.24                   |

693 Disaggregating the simulation results for each year by individual sport shows that the  
 694 primary source of the bias is in the tournaments with the greatest degree of incompleteness  
 695 linked to byes, Greco-Roman wrestling and free-style wrestling (Figs. S4 and S5). No bias  
 696 appears in taekwondo because in both years there are no byes (Section S3). The boxing  
 697 tournaments present incompleteness linked to byes in both years (Section S3). However,  
 698 in these cases the size of the tournaments is large enough that the bias is offset by the  
 699 relatively large number of symmetric bouts (Figure S3).

700 Under the null hypothesis of no effect of red, the expected number of red wins within  
 701 any particular sport will vary stochastically relative to the null. In the cases of boxing and  
 702 taekwondo individually, the observed number of red wins is within the natural variation

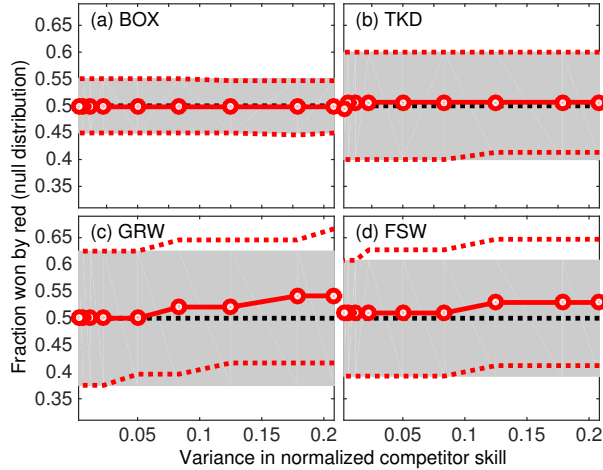

Figure S4: Distributions (5, 50, and 95% quantiles) of the fraction of red wins under the null hypothesis (no effect of red), for the asymmetric 2004 tournaments and equivalent symmetric tournaments, by sport. The distributions were evaluated by Monte Carlo at the locations of the red dots. Combining these distributions yields those shown in Fig. 1c in the main text.

703 we expect, for a null with no structural bias. In the cases of Greco-Roman wrestling and  
 704 free-style wrestling, the observed number of red wins in 2004, and the observed number  
 705 of blue wins in 2008, are likely enhanced as a result of the structural bias we identified in  
 706 these sports.

### 707 S5.3 Summary

708 Our simulations show that in the case where all contestants have equal skill, and thus  
 709 the chance that any color wins in a given bout is even, the tournament structure has no  
 710 impact on the null distribution of the fraction of red wins  $f_{\text{red}}$  (Figure S1); in this case, a  
 711 standard hypothesis test would be sufficient to detect the presence of a red effect. However,  
 712 there is no evidence supporting an assumption that Olympic athletes have equal skill. In  
 713 the unequal skill case, if the tournament structure is symmetric, with an equal number  
 714 of bouts occurring in upper and lower branches of the competition tree, then the null  
 715 distribution of the fraction of wins by red is also symmetric about  $f_{\text{red}} = 0.5$  (Figure S2)  
 716 and a standard hypothesis test would be sufficient. However, when contestants vary in  
 717 skill and the tournament structure is incomplete, the null distribution is shifted away from  
 718  $f_{\text{red}} = 0.5$  (Figure S3). Crucially, the direction of the bias depends only on whether the  
 719 byes are stacked at the bottom of the outermost round, which leads to  $f_{\text{red}} > 0.5$  (i.e.,

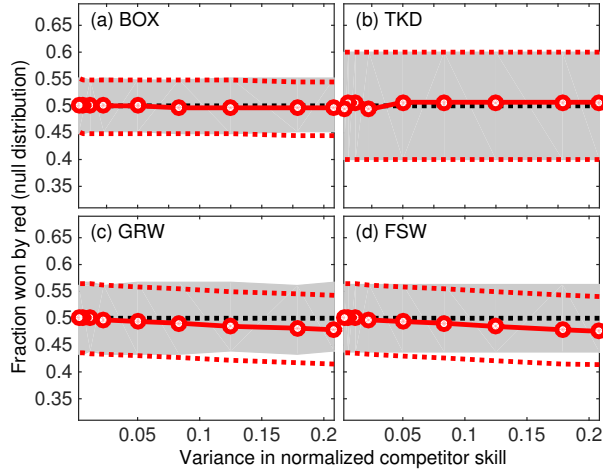

Figure S5: Distributions (5, 50, and 95% quantiles) of the fraction of red wins under the null hypothesis (no effect of red), for the asymmetric 2008 tournaments and equivalent symmetric tournaments, by sport. The distributions were evaluated by Monte Carlo at the locations of the red dots. Combining these distributions yields those shown in Fig. 1d in the main text.

720 more wins by red), or at the top of the round, which leads to  $f_{\text{red}} < 0.5$  (i.e., more wins  
 721 by blue).

722 While the true variance in skill among contestants in the four sports at the 2004 and  
 723 2008 Olympics is not known (Section S4.1.2), simulations on the actual tournament struc-  
 724 tures for the two competitions show a structural bias towards wins by red and blue, re-  
 725 spectively. This is consistent with the empirical pattern observed for each competition  
 726 (Table S5 and Fig. 1a in the main text). Furthermore, as discussed in Section S2.4, the  
 727 only major structural change that occurred between the two competitions is in the wrestling  
 728 tournaments, including a shift in the position of the byes from the bottom of the qualifi-  
 729 cation (8-contestant) round in 2004 to the top of the qualification (32-contestant) round  
 730 in 2008. Consistently, our simulations show that byes at the bottom of the round create a  
 731 bias towards wins by red, whereas byes at the top a create a bias towards wins by blue.



## 732 S6 Discussion

733 We have provided multiple lines of analysis, together with new data, to evaluate Hill &  
734 Barton’s [1] hypothesis that the effect of red on human competition is a response shaped  
735 by sexual selection, analogous to the response observed in other animal species.

736 First, we have shown that the results reported by Hill & Barton [1] in support of the  
737 hypothesis, based on analysis of data for four sports in the 2004 Athens Olympics, present  
738 several shortcomings, from issues of test mis-specification to issues with interpretation.  
739 Even ignoring these, the results underpinning the main claim of a red effect in Hill &  
740 Barton’s [1] analysis are not robust. Consistently, we find that the pattern does not hold  
741 in equivalent data for the 2008 Beijing Olympics, even replicating the exact analytical  
742 approach used by Hill & Barton [1].

743 Second, we have implemented an alternative analytical approach, which addresses sev-  
744 eral of the issues with Hill & Barton’s [1] analysis. This approach allows us to investigate  
745 the rates of Type I and Type II errors associated with our analysis. The results show  
746 that there is no evidence of a red effect in either the 2004 or the 2008 data, and that the  
747 magnitude of any effect that may exist in these data is necessarily small.

748 Finally, we have used simulation to investigate systematic biases in the data-generating  
749 process, due to asymmetries in the tournament structures. The results provide evidence of  
750 a structural bias towards wins by red in the outcomes of the 2004 competition, confirmed by  
751 evidence of a structural bias towards wins by blue in the outcomes of the 2008 competition,  
752 and consistent with patterns observed in the data for the two years.

753 These multiple lines of analysis and new data converge to show that the effect of red on  
754 human competition reported by Hill & Barton [1] can be fully accounted for by structural  
755 features of the tournaments in the four sports analysed. Contrary to previous claims [e.g.,  
756 9], the reported pattern is not due to randomness, but to systematic bias towards wins by  
757 red in the outcomes of the 2004 competition. Thus, it is not necessary to invoke any of  
758 the behavioral, structural, and other confounds that have been proposed over the years as  
759 alternative interpretations to Hill & Barton’s [1]. These include, for example, differences in  
760 visibility between colors, asymmetries in prior experience across contestants (e.g., win–lose  
761 effects and/or number of previous bouts fought), and differences in recovery time due to  
762 variation in intervals between contests [2, 4, 5]. Of course, based on our results we cannot  
763 exclude that these or other factors may operate [see e.g., 10, for suggestive evidence of  
764 a bias in competition judges in taekwondo favoring contestants wearing red]. Yet in the  
765 absence of strong evidence that such factors were at play in the 2004 Athens Olympic  
766 competition, our explanation provides the most comprehensive and parsimonious account  
767 to date of the pattern reported by Hill & Barton [1].

768 What are the implications for the hypothesis of an effect of red on human competition,  
769 shaped by evolutionary processes? A large body of work has developed over the past decade,  
770 straddling the biological and social sciences, building on Hill & Barton’s [1] influential study  
771 [reviewed in 11–13]. Because of the difficulties that arise in disentangling a “real” effect of

772 red from potential confounds in observational data, researchers have increasingly turned  
773 to experiments to demonstrate the existence of such an effect. Irrespective of the approach  
774 used, work in this area routinely points to Hill & Barton’s [1] results as *the* key evidence  
775 that the effect of red on human competition is a response shaped by sexual selection and,  
776 by implication, *the* key evidence of “parallels between the human and nonhuman response  
777 to color” [13, p. 115]. By refuting Hill & Barton’s [1] results, our work calls for a critical  
778 re-evaluation of this body of work, together with re-assessment of the theoretical premise  
779 of future studies that depend on it conceptually. In particular, extreme caution is required  
780 when invoking an evolutionary basis for any effect of red on human competition, and on  
781 human behavior more generally, that is demonstrably robust.

782       Ultimately, there is no question about whether the human response to color has been  
783 shaped by evolutionary processes over time. In what way it has been shaped by them, and  
784 how this is reflected in present-day human behavior, remain open questions.

## 785 References

- 786 1. Hill, R. A. & Barton, R. A. Red enhances human performance in contests. *Nature*  
787 **435**, 293–293 (2005).
- 788 2. Dijkstra, P. D. & Preenen, P. T. No effect of blue on winning contests in judo. *Pro-*  
789 *ceedings of the Royal Society of London B: Biological Sciences* **275**, 1157–1162 (2008).
- 790 3. Seife, C. *Red does not enhance human performance in the Olympics* [http://www.](http://www.users.cloud9.net/~cgseife/SeifeOlympicsManuscript12February.pdf)  
791 [users.cloud9.net/~cgseife/SeifeOlympicsManuscript12February.pdf](http://www.users.cloud9.net/~cgseife/SeifeOlympicsManuscript12February.pdf). [On-  
792 line; retrieved on 2014-03-06].
- 793 4. Rowe, C., Harris, J. M. & Roberts, S. C. Corrigendum: Sporting contests: Seeing red?  
794 Putting sportswear in context. *Nature* **441**, E3 (2005).
- 795 5. Rowe, C., Harris, J. M. & Roberts, S. C. Sporting contests: Seeing red? Putting  
796 sportswear in context. *Nature* **437**, E10–E10 (2005).
- 797 6. Benjamini, Y. & Hochberg, Y. Controlling the false discovery rate: a practical and  
798 powerful approach to multiple testing. *J. Royal Statistical Society: Series B* **57**, 289–  
799 300 (1995).
- 800 7. Dunn, O. J. Estimation of the medians for dependent variables. *Annals of Mathemat-*  
801 *ical Statistics* **30**, 192–197 (1959).
- 802 8. Bradley, R. & Terry, M. Rank analysis of incomplete block designs. I. The method of  
803 paired comparisons. *Biometrika* **39**, 324–345 (1952).
- 804 9. Seife, C. *Proofiness: how you're being fooled by the numbers* (Penguin Publishing  
805 Group, 2010).
- 806 10. Hagemann, N., Strauss, B. & Leißing, J. When the referee sees red... *Psychological*  
807 *Science* **19**, 769–771 (2008).
- 808 11. Wiedemann, D., Barton, R. A. & Hill, R. A. in *Applied evolutionary psychology* (ed  
809 Roberts, S. C.) 290–307 (Oxford University Press, Oxford, 2012).
- 810 12. Maier, M. A., Hill, R. A., Elliot, A. J. & Barton, R. A. in *Handbook of color psychology*  
811 (eds Elliot, A. J., Fairchild, M. D. & Franklin, A.) 568–584 (Cambridge University  
812 Press, Cambridge, 2015).
- 813 13. Elliot, A. J. & Maier, M. A. Color psychology: effects of perceiving color on psycho-  
814 logical functioning in humans. *Annual Review of Psychology* **65**, 95–120 (2014).

## 815 **Acknowledgments**

816 We thank Tony Black of USA Wrestling, Jeongkang Seo of the World Taekwondo Federation  
817 (WTF), Sébastien Gillot of the International Boxing Association (AIBA), “Iceman” John  
818 Scully, Janusz Majcher, Andrew Baldwin, Justin Rao, for helpful conversations about  
819 Olympic sports. Adam Kenny and Sears Merritt provided research assistance. Mirta  
820 Galesic, Robert Barton, and Russell Hill provided helpful feedback on the manuscript.

821 **Session information**

- 822 • R version 3.3.1 (2016-06-21), x86\_64-pc-linux-gnu
- 823 • Base packages: base, datasets, graphics, grDevices, methods, stats, utils
- 824 • Other packages: dplyr 0.5.0, knitr 1.14, xtable 1.8-2
- 825 • Loaded via a namespace (and not attached): assertthat 0.1, DBI 0.5-1, evaluate 0.9,  
826 formatR 1.4, highr 0.6, lazyeval 0.2.0, magrittr 1.5, R6 2.1.3, Rcpp 0.12.7,  
827 stringi 1.1.1, stringr 1.1.0, tibble 1.2, tools 3.3.1
